# Supplementary material
Source: PubMed Central journal article supplement (PMC5630245)
Supplement: jc.2017-00589.sf1.pdf [file jc.2017-00589.sf1.pdf]

**Supplemental Figure 1– Prevalence of diabetic complications overall and by diabetes duration tertile**

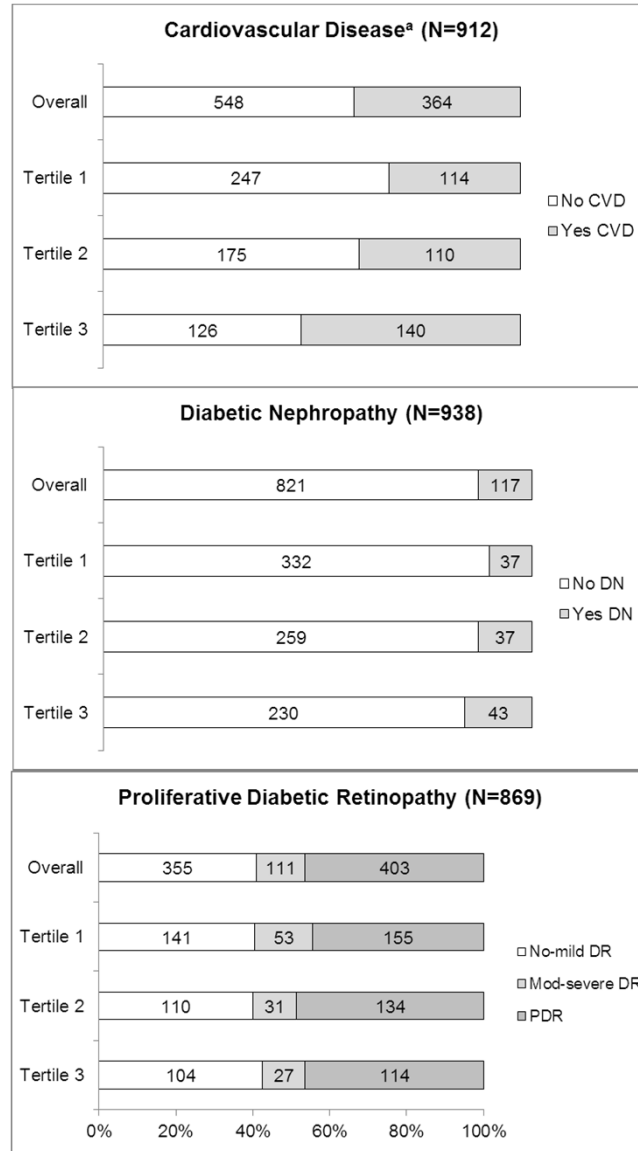

\*p<0.001 between the three tertiles

Supplemental Figure 2. Correlation between average historical A1c (mmol/mol) and current A1c (mmol/mol) measurements in Joslin 50-Year Medalists who received regular care at JDC (n=99)

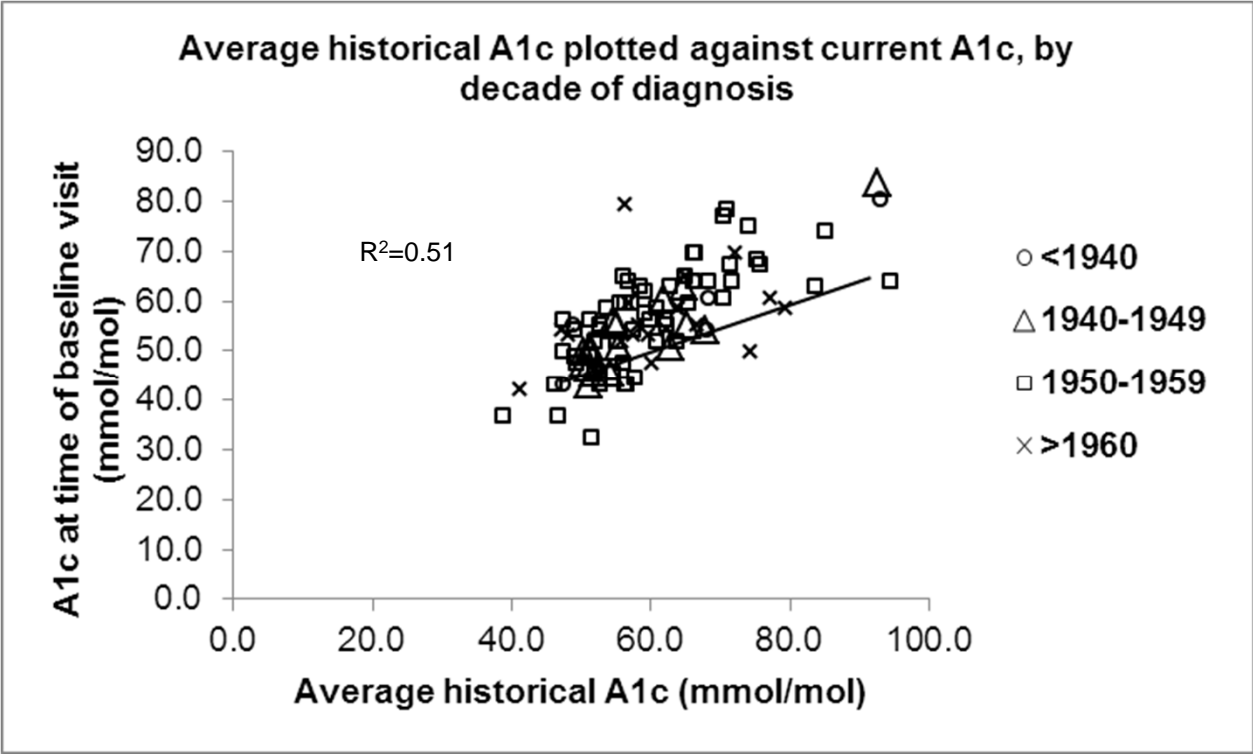

**Supplemental Table 1a. Clinical characteristics of Joslin 50-Year Medalists by cardiovascular disease (CVD) and diabetes duration tertile**

| Variable                                   | Tertile 1<br>N=361<br>50-51 years |        |             |        |         | Tertile 2<br>N=285<br>52-55 years |        |             |        |         | Tertile 3<br>N=266<br>56-85 years |        |             |        |         |
|--------------------------------------------|-----------------------------------|--------|-------------|--------|---------|-----------------------------------|--------|-------------|--------|---------|-----------------------------------|--------|-------------|--------|---------|
|                                            | No CVD (n=247)                    |        | CVD (n=114) |        | p value | No CVD (n=175)                    |        | CVD (n=110) |        | p value | No CVD (n=126)                    |        | CVD (n=140) |        | p value |
|                                            | Mean; %                           | SD (±) | Mean; %     | SD (±) |         | Mean; %                           | SD (±) | Mean; %     | SD (±) |         | Mean; %                           | SD (±) | Mean; %     | SD (±) |         |
| Sex (male)                                 | 36.8                              |        | 50.9        |        | 0.01    | 42.3                              |        | 57.3        |        | 0.01    | 45.2                              |        | 53.6        |        | 0.17    |
| Age (years)                                | 62.5                              | 6.7    | 64.2        | 6.5    | 0.02    | 63.8                              | 5.9    | 66.3        | 7.2    | 0.003   | 69.3                              | 6.1    | 72.2        | 7.7    | 0.003   |
| Age at diagnosis (years)                   | 12.0                              | 6.7    | 13.7        | 6.5    | 0.02    | 10.6                              | 5.9    | 13.0        | 7.0    | 0.004   | 8.8                               | 5.2    | 9.5         | 5.5    | 0.33    |
| Duration (years)                           | 50.5                              | 0.5    | 50.5        | 0.5    | 0.88    | 53.2                              | 1.0    | 53.3        | 1.1    | 0.35    | 60.5                              | 4.6    | 62.7        | 6.7    | 0.01    |
| Insulin dose/kilogram (units/kg)           | 0.44                              | 0.15   | 0.48        | 0.17   | 0.02    | 0.47                              | 0.22   | 0.47        | 0.16   | 0.41    | 0.46                              | 0.20   | 0.44        | 0.15   | 0.85    |
| HbA1c (%)                                  | 7.1                               | 1.0    | 7.3         | 0.9    | 0.02    | 7.1                               | 1.0    | 7.3         | 0.9    | 0.1     | 7.0                               | 0.9    | 7.3         | 0.8    | 0.004   |
| HbA1c (mmol/mol)                           | 54.0                              | 10.6   | 56.2        | 10.2   | 0.02    | 54.0                              | 11.1   | 56.0        | 9.9    | 0.10    | 53.4                              | 9.9    | 56.8        | 9.2    | 0.004   |
| Total cholesterol (mmol/L)                 | 4.3                               | 0.8    | 3.9         | 0.7    | <0.001  | 4.5                               | 0.9    | 3.9         | 0.8    | <0.001  | 4.3                               | 0.7    | 3.9         | 0.8    | <0.001  |
| LDL (mmol/L)                               | 2.2                               | 0.6    | 1.9         | 0.6    | 0.003   | 2.2                               | 0.6    | 2.0         | 0.6    | <0.001  | 2.2                               | 0.6    | 1.9         | 0.5    | <0.001  |
| HDLc (mmol/L)                              | 1.8                               | 0.5    | 1.6         | 0.5    | <0.001  | 1.8                               | 0.6    | 1.5         | 0.4    | <0.001  | 1.8                               | 0.5    | 1.6         | 0.5    | 0.002   |
| Triglycerides (mmol/L)                     | 0.8                               | 0.4    | 0.9         | 0.4    | 0.08    | 0.8                               | 0.4    | 0.9         | 0.6    | 0.28    | 0.9                               | 0.4    | 0.9         | 0.4    | 0.75    |
| Systolic blood pressure (mmHg)             | 132.2                             | 15.2   | 129.0       | 18.1   | 0.04    | 134.0                             | 16.7   | 130.8       | 16.9   | 0.15    | 135.5                             | 18.3   | 130.7       | 17.4   | 0.06    |
| Diastolic blood pressure (mmHg)            | 66.1                              | 8.5    | 64.1        | 7.8    | 0.03    | 65.1                              | 9.2    | 61.5        | 8.5    | 0.007   | 62.6                              | 7.3    | 62.2        | 9.1    | 0.56    |
| Body mass index (kg/m <sup>2</sup> )       | 26.1                              | 4.8    | 27.4        | 4.9    | 0.006   | 25.8                              | 4.9    | 26.2        | 4.2    | 0.17    | 25.5                              | 4.1    | 26.3        | 4.8    | 0.15    |
| eGFR (ml/min/1.73 m <sup>2</sup> )         | 76.8                              | 18.8   | 68.0        | 21.6   | <0.001  | 73.2                              | 18.2   | 61.7        | 20.1   | <0.001  | 68.9                              | 19.3   | 59.5        | 18.5   | <0.001  |
| Serum creatinine (µmol/L)                  | 83.1                              | 26.0   | 100.8       | 48.1   | <0.001  | 86.9                              | 25.0   | 110.8       | 58.1   | <0.001  | 90.9                              | 34.4   | 111.3       | 78.0   | <0.001  |
| ACR (mg/mmol)                              | 10.0                              | 66.4   | 6.8         | 18.7   | 0.004   | 6.8                               | 50.2   | 8.0         | 17.7   | 0.004   | 4.0                               | 9.9    | 10.1        | 21.0   | 0.03    |
| CRP (nmol/L)                               | 13.8                              | 39.2   | 15.2        | 25.2   | 0.04    | 15.3                              | 31.9   | 30.0        | 85.7   | 0.04    | 14.1                              | 22.1   | 25.3        | 48.1   | 0.01    |
| Insulin pump use                           | 68.6                              |        | 67.3        |        | 0.80    | 63.0                              |        | 57.3        |        | 0.34    | 49.2                              |        | 41.7        |        | 0.22    |
| Regular physical activity                  | 84.0                              |        | 77.0        |        | 0.11    | 83.4                              |        | 74.1        |        | 0.06    | 78.6                              |        | 73.0        |        | 0.29    |
| PDR (ETDRS>53)                             | 41.7                              |        | 54.1        |        | 0.03    | 39.4                              |        | 65.3        |        | <0.001  | 39.5                              |        | 53.3        |        | 0.03    |
| DN (eGFR≤45 ml/min/1.73m <sup>2</sup> )    | 7.0                               |        | 16.8        |        | 0.004   | 8.1                               |        | 19.6        |        | 0.004   | 12.2                              |        | 19.4        |        | 0.11    |
| MNSI≥2                                     | 71.1                              |        | 82.7        |        | 0.02    | 64.5                              |        | 69.6        |        | 0.39    | 64.2                              |        | 67.7        |        | 0.56    |
| Antihypertensive medication                | 59.1                              |        | 72.6        |        | 0.01    | 57.8                              |        | 71.4        |        | 0.02    | 63.7                              |        | 71.7        |        | 0.16    |
| Lipid lowering medication                  | 65.8                              |        | 90.2        |        | <0.001  | 57.5                              |        | 83.6        |        | <0.001  | 54.8                              |        | 80.3        |        | <0.001  |
| Detectable random c-peptide (>0.02 nmol/L) | 33.2                              |        | 37.2        |        | 0.46    | 33.9                              |        | 32.1        |        | 0.75    | 41.1                              |        | 32.4        |        | 0.14    |
| IA2+ or GAD65+                             | 48.4                              |        | 47.1        |        | 0.83    | 46.1                              |        | 38.3        |        | 0.23    | 37.7                              |        | 33.9        |        | 0.53    |
| DR3 or 4                                   | 95.0                              |        | 97.9        |        | 0.22    | 93.4                              |        | 89.9        |        | 0.31    | 95.5                              |        | 97.0        |        | 0.54    |

eGFR: Estimated glomerular filtration rate;ACR: albumin-creatinine ratio;CRP: c-reactive protein; PDR: proliferative diabetic retinopathy; DN: diabetic nephropathy; MNSI: Michigan Neuropathy Screening Instrument

## Supplemental Table 1b. Clinical characteristics of Joslin 50-Year Medalists by diabetic nephropathy (DN) and diabetes duration tertile

| Variable                                   | Tertile 1<br>N=369<br>50-51 years |        |           |        |         | Tertile 2<br>N=296<br>52-55 years |        |           |        |         | Tertile 3<br>N=273<br>56-85 years |        |           |        |         |
|--------------------------------------------|-----------------------------------|--------|-----------|--------|---------|-----------------------------------|--------|-----------|--------|---------|-----------------------------------|--------|-----------|--------|---------|
|                                            | No DN (n=332)                     |        | DN (n=37) |        | p value | No DN (n=259)                     |        | DN (n=37) |        | p value | No DN (n=230)                     |        | DN (n=43) |        | p value |
|                                            | Mean: %                           | SD (±) | Mean: %   | SD (±) |         | Mean: %                           | SD (±) | Mean: %   | SD (±) |         | Mean: %                           | SD (±) | Mean: %   | SD (±) |         |
| Sex (male)                                 | 41.9                              |        | 43.2      |        | 0.87    | 48.3                              |        | 43.2      |        | 0.57    | 51.3                              |        | 46.5      |        | 0.56    |
| Age (years)                                | 62.7                              | 6.5    | 65.8      | 7.3    | 0.02    | 64.5                              | 6.5    | 65.7      | 6.6    | 0.20    | 70.7                              | 7.1    | 72.8      | 7.2    | 0.08    |
| Age at diagnosis (years)                   | 12.2                              | 6.5    | 15.2      | 7.1    | 0.03    | 11.2                              | 6.4    | 12.4      | 6.4    | 0.22    | 9.3                               | 5.5    | 9.2       | 5.0    | >0.99   |
| Duration (years)                           | 50.5                              | 0.5    | 50.6      | 0.5    | 0.12    | 53.2                              | 1.1    | 53.3      | 1.1    | 0.83    | 61.4                              | 5.8    | 63.6      | 6.3    | 0.02    |
| Insulin dose/kilogram (units/kg)           | 0.45                              | 0.15   | 0.47      | 0.18   | 0.47    | 0.47                              | 0.19   | 0.45      | 0.23   | 0.94    | 0.45                              | 0.18   | 0.44      | 0.18   | 0.73    |
| HbA1c (%)                                  | 7.2                               | 1.0    | 7.1       | 1.1    | 0.44    | 7.2                               | 1.0    | 7.1       | 0.9    | 0.55    | 7.2                               | 0.8    | 7.4       | 1.0    | 0.22    |
| HbA1c (mmol/mol)                           | 54.8                              | 10.4   | 54.3      | 12.2   | 0.44    | 54.9                              | 10.6   | 53.6      | 10.3   | 0.55    | 54.9                              | 9.2    | 57.3      | 11.4   | 0.22    |
| Total cholesterol (mmol/L)                 | 4.2                               | 0.8    | 4.0       | 1.0    | 0.03    | 4.3                               | 0.9    | 4.2       | 1.1    | 0.54    | 4.1                               | 0.8    | 4.1       | 0.8    | 0.98    |
| LDL (mmol/L)                               | 2.1                               | 0.6    | 2.0       | 0.8    | 0.17    | 2.1                               | 0.6    | 2.2       | 0.7    | 0.63    | 2.0                               | 0.6    | 2.0       | 0.6    | 0.59    |
| HDLc (mmol/L)                              | 1.7                               | 0.5    | 1.5       | 0.5    | 0.007   | 1.7                               | 0.5    | 1.4       | 0.6    | <0.001  | 1.7                               | 0.5    | 1.5       | 0.5    | 0.07    |
| Triglycerides (mmol/L)                     | 0.8                               | 0.4    | 1.0       | 0.4    | 0.002   | 0.8                               | 0.4    | 1.2       | 0.8    | <0.001  | 0.8                               | 0.4    | 1.0       | 0.4    | <0.001  |
| Systolic blood pressure (mmHg)             | 130.4                             | 15.9   | 136.0     | 17.1   | 0.09    | 132.8                             | 16.7   | 129.5     | 18.5   | 0.16    | 133.1                             | 17.2   | 132.2     | 19.7   | 0.56    |
| Diastolic blood pressure (mmHg)            | 65.6                              | 8.1    | 65.3      | 10.0   | 0.23    | 63.6                              | 9.2    | 62.8      | 7.0    | 0.60    | 63.0                              | 7.9    | 60.6      | 10.1   | 0.07    |
| Body mass index (kg/m <sup>2</sup> )       | 26.4                              | 4.8    | 28.0      | 6.0    | 0.06    | 25.6                              | 4.1    | 28.1      | 6.9    | 0.05    | 25.8                              | 4.6    | 26.3      | 4.0    | 0.27    |
| eGFR (ml/min/1.73 m <sup>2</sup> )         | 78.5                              | 15.7   | 34.0      | 8.7    | <0.001  | 74.1                              | 15.5   | 33.8      | 8.9    | <0.001  | 69.8                              | 15.2   | 34.4      | 11.3   | <0.001  |
| Serum creatinine (µmol/L)                  | 80.2                              | 18.2   | 166.0     | 54.6   | <0.001  | 84.8                              | 17.8   | 170.6     | 73.8   | <0.001  | 86.8                              | 18.6   | 179.2     | 124.2  | <0.001  |
| ACR (mg/mmol)                              | 7.3                               | 55.4   | 21.9      | 45.3   | <0.001  | 2.5                               | 4.0    | 39.6      | 109.3  | <0.001  | 6.0                               | 12.4   | 19.2      | 36.1   | 0.01    |
| CRP (nmol/L)                               | 14.0                              | 35.4   | 14.6      | 28.9   | 0.56    | 20.1                              | 59.5   | 25.3      | 40.2   | 0.14    | 19.9                              | 39.7   | 22.2      | 32.0   | 0.27    |
| Insulin pump use                           | 68.6                              |        | 61.1      |        | 0.36    | 60.1                              |        | 63.9      |        | 0.66    | 44.9                              |        | 48.8      |        | 0.65    |
| Regular physical activity                  | 82.1                              |        | 75.0      |        | 0.30    | 83.0                              |        | 63.9      |        | 0.01    | 79.5                              |        | 59.5      |        | 0.005   |
| CVD                                        | 29.4                              |        | 52.8      |        | 0.004   | 35.0                              |        | 60.0      |        | 0.004   | 50.9                              |        | 64.3      |        | 0.11    |
| PDR (ETDRS>53)                             | 43.0                              |        | 56.8      |        | 0.11    | 47.1                              |        | 62.1      |        | 0.13    | 44.2                              |        | 59.5      |        | 0.09    |
| MNSI≥2                                     | 73.2                              |        | 91.2      |        | 0.02    | 69.3                              |        | 45.7      |        | 0.01    | 68.5                              |        | 60.0      |        | 0.29    |
| Antihypertensive medication                | 60.7                              |        | 88.6      |        | 0.001   | 59.0                              |        | 85.7      |        | 0.002   | 67.7                              |        | 73.8      |        | 0.43    |
| Lipid lowering medication                  | 71.4                              |        | 88.9      |        | 0.02    | 66.1                              |        | 69.4      |        | 0.69    | 68.6                              |        | 65.0      |        | 0.65    |
| Detectable random c-peptide (>0.02 nmol/L) | 33.2                              |        | 37.8      |        | 0.57    | 33.3                              |        | 35.1      |        | 0.99    | 35.7                              |        | 35.7      |        | 0.99    |
| IA2+ or GAD65+                             | 49.2                              |        | 21.3      |        | 0.05    | 44.0                              |        | 40.0      |        | 0.66    | 36.8                              |        | 44.7      |        | 0.35    |
| DR3 or 4                                   | 95.9                              |        | 96.8      |        | 0.82    | 92.2                              |        | 94.1      |        | 0.69    | 95.3                              |        | 100.0     |        | 0.17    |

eGFR: Estimated glomerular filtration rate; ACR: albumin-creatinine ratio; CRP: c-reactive protein; CVD: cardiovascular disease; PDR: proliferative diabetic retinopathy; MNSI: Michigan Neuropathy Screening Instrument

**Supplemental Table 1c. Clinical characteristics of Joslin 50-Year Medalists by proliferative diabetic retinopathy (PDR) and diabetes duration tertile**

| Variable                                   | Tertile 1<br>N=349<br>50-51 years |        |             |        |         | Tertile 2<br>N=275<br>52-55 years |        |             |        |         | Tertile 3<br>N=245<br>56-85 years |        |             |        |         |
|--------------------------------------------|-----------------------------------|--------|-------------|--------|---------|-----------------------------------|--------|-------------|--------|---------|-----------------------------------|--------|-------------|--------|---------|
|                                            | No PDR (n=194)                    |        | PDR (n=155) |        | p value | No PDR (n=141)                    |        | PDR (n=134) |        | p value | No PDR (n=131)                    |        | PDR (n=114) |        | p value |
|                                            | Mean; %                           | SD (±) | Mean; %     | SD (±) |         | Mean; %                           | SD (±) | Mean; %     | SD (±) |         | Mean; %                           | SD (±) | Mean; %     | SD (±) |         |
| Sex (male)                                 | 49.0                              |        | 32.9        |        | 0.003   | 50.4                              |        | 53.0        |        | 0.66    | 45.8                              |        | 54.4        |        | 0.18    |
| Age (years)                                | 63.6                              | 6.9    | 62.0        | 6.1    | 0.03    | 65.4                              | 6.9    | 63.6        | 5.7    | 0.05    | 70.5                              | 6.7    | 70.1        | 6.3    | 0.74    |
| Age at diagnosis (years)                   | 13.0                              | 6.9    | 11.5        | 6.1    | 0.03    | 12.2                              | 6.8    | 10.3        | 5.6    | 0.02    | 8.9                               | 5.4    | 9.2         | 5.1    | 0.55    |
| Duration (years)                           | 50.6                              | 0.5    | 50.5        | 0.5    | 0.37    | 53.1                              | 1.1    | 53.4        | 1.1    | 0.09    | 61.5                              | 5.3    | 60.8        | 5.2    | 0.19    |
| Insulin dose/kilogram (units/kg)           | 0.45                              | 0.16   | 0.45        | 0.15   | 0.79    | 0.47                              | 0.2    | 0.48        | 0.2    | 0.28    | 0.47                              | 0.21   | 0.44        | 0.14   | 0.81    |
| HbA1c (%)                                  | 7.0                               | 0.9    | 7.3         | 1.0    | 0.01    | 7.1                               | 0.8    | 7.1         | 0.9    | 0.84    | 7.2                               | 0.9    | 7.3         | 0.9    | 0.67    |
| HbA1c (mmol/mol)                           | 53.2                              | 9.9    | 56.8        | 11.3   | 0.01    | 54.6                              | 8.9    | 54.4        | 9.8    | 0.84    | 55.2                              | 9.5    | 55.8        | 10.0   | 0.67    |
| Total cholesterol (mmol/L)                 | 4.2                               | 0.9    | 4.1         | 0.8    | 0.70    | 4.3                               | 0.9    | 4.2         | 0.9    | 0.27    | 4.1                               | 0.8    | 4.0         | 0.8    | 0.29    |
| LDL (mmol/L)                               | 2.2                               | 0.7    | 2.0         | 0.6    | 0.21    | 2.1                               | 0.6    | 2.1         | 0.7    | 0.56    | 2.0                               | 0.6    | 2.0         | 0.5    | 0.85    |
| HDLc (mmol/L)                              | 1.7                               | 0.5    | 1.7         | 0.5    | 0.93    | 1.8                               | 0.6    | 1.6         | 0.5    | 0.06    | 1.7                               | 0.5    | 1.6         | 0.5    | 0.19    |
| Triglycerides (mmol/L)                     | 0.8                               | 0.4    | 0.9         | 0.5    | 0.004   | 0.8                               | 0.3    | 0.9         | 0.5    | 0.39    | 0.8                               | 0.4    | 0.8         | 0.4    | 0.85    |
| Systolic blood pressure (mmHg)             | 131.7                             | 15.8   | 130.6       | 16.6   | 0.47    | 133.5                             | 17.1   | 130.8       | 16.2   | 0.27    | 134.7                             | 18.3   | 131.0       | 17.2   | 0.09    |
| Diastolic blood pressure (mmHg)            | 66.0                              | 8.2    | 64.7        | 8.3    | 0.16    | 64.7                              | 9.5    | 62.3        | 8.7    | 0.13    | 63.0                              | 9.2    | 62.4        | 7.6    | 0.71    |
| Body mass index (kg/m <sup>2</sup> )       | 25.9                              | 4.3    | 27.4        | 5.5    | 0.03    | 25.7                              | 4.4    | 26.3        | 4.8    | 0.29    | 25.6                              | 4.5    | 26.5        | 4.6    | 0.17    |
| eGFR (ml/min/1.73 m <sup>2</sup> )         | 76.6                              | 19.1   | 70.3        | 21.4   | 0.004   | 73.8                              | 18.1   | 66.0        | 18.8   | 0.001   | 66.0                              | 17.6   | 63.4        | 20.3   | 0.50    |
| Serum creatinine (µmol/L)                  | 86.4                              | 32.9   | 92.9        | 39.8   | 0.05    | 86.4                              | 23.4   | 98.3        | 32.9   | 0.001   | 92.5                              | 28.6   | 104.7       | 53.2   | 0.10    |
| ACR (mg/mmol)                              | 4.3                               | 19.7   | 15.6        | 79.4   | <0.001  | 7.8                               | 54.5   | 4.9         | 12.0   | 0.48    | 6.3                               | 17.2   | 8.9         | 18.2   | 0.22    |
| CRP (nmol/L)                               | 13.3                              | 34.2   | 15.5        | 37.2   | 0.07    | 24.2                              | 76.6   | 17.2        | 31.0   | 0.45    | 19.3                              | 31.9   | 22.4        | 47.4   | 0.67    |
| Insulin pump use                           | 66.3                              |        | 70.2        |        | 0.45    | 60.7                              |        | 60.9        |        | 0.98    | 43.9                              |        | 47.3        |        | 0.59    |
| Regular physical activity                  | 83.1                              |        | 80.1        |        | 0.49    | 85.3                              |        | 77.3        |        | 0.09    | 78.5                              |        | 77.5        |        | 0.85    |
| CVD                                        | 27.3                              |        | 38.3        |        | 0.03    | 24.8                              |        | 48.8        |        | <0.001  | 45.2                              |        | 59.1        |        | 0.03    |
| DN (eGFR≤45 ml/min/1.73m <sup>2</sup> )    | 8.3                               |        | 13.6        |        | 0.11    | 7.9                               |        | 13.5        |        | 0.13    | 11.5                              |        | 19.5        |        | 0.09    |
| MNSI≥2                                     | 67.0                              |        | 83.0        |        | 0.001   | 67.2                              |        | 67.9        |        | 0.89    | 66.1                              |        | 68.5        |        | 0.70    |
| Antihypertensive medication                | 60.9                              |        | 68.2        |        | 0.16    | 60.2                              |        | 65.7        |        | 0.36    | 63.0                              |        | 77.7        |        | 0.01    |
| Lipid lowering medication                  | 69.7                              |        | 78.2        |        | 0.08    | 63.2                              |        | 71.4        |        | 0.15    | 66.7                              |        | 71.4        |        | 0.43    |
| Detectable random c-peptide (>0.02 nmol/L) | 34.9                              |        | 32.9        |        | 0.7     | 61.4                              |        | 69.9        |        | 0.14    | 40.5                              |        | 33.6        |        | 0.27    |
| IA2+ or GAD65+                             | 45.6                              |        | 49.3        |        | 0.52    | 49.2                              |        | 38.0        |        | 0.08    | 36.1                              |        | 41.1        |        | 0.44    |
| DR3 or 4                                   | 95.4                              |        | 96.4        |        | 0.65    | 91.3                              |        | 92.4        |        | 0.75    | 99.2                              |        | 93.3        |        | 0.02    |

eGFR: Estimated glomerular filtration rate; ACR: albumin-creatinine ratio; CRP: c-reactive protein; CVD: cardiovascular disease; DN: diabetic nephropathy; MNSI: Michigan Neuropathy Screening Instrument

**Supplemental Table 2a. Logistic regression model for association with cardiovascular disease stratified by tertile, with main effect A1c**

|                                                        | <b>Tertile 1<br/>50-51 years</b> |                | <b>Tertile 2<br/>52-55 years</b> |                | <b>Tertile 3<br/>56-85 years</b> |                |
|--------------------------------------------------------|----------------------------------|----------------|----------------------------------|----------------|----------------------------------|----------------|
|                                                        | <b>OR (95% CI)</b>               | <b>p value</b> | <b>OR (95% CI)</b>               | <b>p value</b> | <b>OR (95% CI)</b>               | <b>p value</b> |
| <b>A1c (mmol/mol)</b>                                  | 1.01 (0.99, 1.04)                | 0.33           | 1.03 (1.00, 1.06)                | 0.10           | 1.08 (1.04, 1.13)                | <0.001         |
| <b>Sex (Male vs Female)</b>                            | 1.59 (0.93, 2.72)                | 0.09           | 1.86 (0.99, 3.50)                | 0.06           | 1.54 (0.77, 3.09)                | 0.22           |
| <b>Duration of diabetes (years)</b>                    | 0.90 (0.54, 1.50)                | 0.68           | 1.19 (0.90, 1.58)                | 0.22           | 1.07 (1.01, 1.14)                | 0.02           |
| <b>Total cholesterol (mmol/L)</b>                      | 0.73 (0.51, 1.05)                | 0.09           | 0.61 (0.41, 0.91)                | 0.02           | 0.53 (0.32, 0.86)                | 0.01           |
| <b>Antihypertensive medication (Yes vs No)</b>         | 1.34 (0.75, 2.39)                | 0.33           | 1.90 (0.97, 3.72)                | 0.06           | 1.63 (0.81, 3.30)                | 0.17           |
| <b>Lipid-lowering medication (Yes vs No)</b>           | 3.46 (1.63, 7.35)                | 0.001          | 3.13 (1.46, 6.71)                | 0.003          | 2.24 (1.10, 4.57)                | 0.03           |
| <b>Body mass index</b>                                 | 1.00 (0.95, 1.06)                | 0.88           | 0.96 (0.90, 1.03)                | 0.24           | 0.98 (0.91, 1.05)                | 0.54           |
| <b>Neuropathy (MNSI<math>\geq</math>2) (Yes vs No)</b> | 2.08 (1.10, 3.94)                | 0.02           | 0.74 (0.39, 1.40)                | 0.35           | 0.71 (0.34, 1.45)                | 0.34           |

**Supplemental Table 2b. Logistic regression model for association with diabetic nephropathy stratified by tertile, with main effect A1c**

|                                                | Tertile 1<br>50-51 years |         | Tertile 2<br>52-55 years |         | Tertile 3<br>56-85 years |         |
|------------------------------------------------|--------------------------|---------|--------------------------|---------|--------------------------|---------|
|                                                | OR (95% CI)              | p value | OR (95% CI)              | p value | OR (95% CI)              | p value |
| <b>A1c (mmol/mol)</b>                          | 0.99 (0.96, 1.03)        | 0.62    | 0.99 (0.95, 1.03)        | 0.49    | 1.02 (0.98, 1.06)        | 0.37    |
| <b>Sex (Male vs Female)</b>                    | 0.52 (0.23, 1.20)        | 0.13    | 0.44 (0.19, 1.00)        | 0.05    | 0.57 (0.26, 1.24)        | 0.16    |
| <b>Duration of diabetes (years)</b>            | 2.25 (1.04, 4.89)        | 0.04    | 1.04 (0.73, 1.49)        | 0.83    | 1.07 (1.01, 1.13)        | 0.02    |
| <b>HDLc (mmol/L)</b>                           | 0.27 (0.11, 0.68)        | 0.006   | 0.37 (0.15, 0.92)        | 0.03    | 0.46 (0.20, 1.06)        | 0.07    |
| <b>Cardiovascular disease (Yes vs No)</b>      | 2.46 (1.15, 5.26)        | 0.02    | 2.21 (0.99, 4.95)        | 0.05    | 1.27 (0.61, 2.65)        | 0.53    |
| <b>Antihypertensive medication (Yes vs No)</b> | 4.65 (1.56, 13.89)       | 0.006   | 3.21 (1.14, 9.09)        | 0.03    | 1.46 (0.68, 3.17)        | 0.33    |

**Supplemental Table 2c. Logistic regression model for association with proliferative diabetic retinopathy stratified by tertile, with main effect A1c**

|                                                | <b>Tertile 1<br/>50-51 years</b> |                | <b>Tertile 2<br/>52-55 years</b> |                | <b>Tertile 3<br/>56-85 years</b> |                |
|------------------------------------------------|----------------------------------|----------------|----------------------------------|----------------|----------------------------------|----------------|
|                                                | <b>OR (95% CI)</b>               | <b>p value</b> | <b>OR (95% CI)</b>               | <b>p value</b> | <b>OR (95% CI)</b>               | <b>p value</b> |
| <b>A1c (mmol/mol)</b>                          | 1.03 (1.00, 1.05)                | 0.03           | 0.98 (0.95, 1.01)                | 0.24           | 1.01 (0.98, 1.04)                | 0.52           |
| <b>Sex (Male vs Female)</b>                    | 0.54 (0.32, 0.91)                | 0.02           | 0.64 (0.35, 1.17)                | 0.15           | 1.62 (0.87, 3.01)                | 0.13           |
| <b>Age (years)</b>                             | 0.96 (0.93, 1.00)                | 0.03           | 0.93 (0.89, 0.97)                | 0.001          | 0.99 (0.95, 1.03)                | 0.60           |
| <b>HDLc (mmol/L)<sup>a</sup></b>               | 0.86 (0.52, 1.43)                | 0.56           | 0.60 (0.34, 1.04)                | 0.07           | 0.88 (0.48, 1.58)                | 0.66           |
| <b>Antihypertensive medication (Yes vs No)</b> | 0.71 (0.43, 1.16)                | 0.17           | 0.91 (0.51, 1.63)                | 0.75           | 0.50 (0.28, 0.90)                | 0.02           |
| <b>Cardiovascular disease (Yes vs No)</b>      | 1.70 (1.03, 2.80)                | 0.04           | 3.91 (2.07, 7.41)                | <0.001         | 1.66 (0.95, 2.91)                | 0.08           |

<sup>a</sup>HDLc has a confounding effect with sex



**Supplemental Table 3. Characteristics by decade of diagnosis among Joslin 50 Year Medalists**

| Variable                                   | <1940<br>N=45 |        | 1940-1949<br>N=138 |        | 1950-1959<br>N=524 |        | 1960+<br>N=245 |        | p value |
|--------------------------------------------|---------------|--------|--------------------|--------|--------------------|--------|----------------|--------|---------|
|                                            | Mean; %       | SD (±) | Mean; %            | SD (±) | Mean; %            | SD (±) | Mean; %        | SD (±) |         |
| Deceased                                   | 53.3          | (24)   | 29.0               | (40)   | 10.5               | (55)   | 1.6            | (4)    | <0.001  |
| Sex (male)                                 | 60.0          |        | 51.5               |        | 47.5               |        | 35.9           |        | 0.001   |
| Age (years)                                | 79.3          | 6.2    | 70.4               | 6.3    | 64.9               | 6.7    | 63.0           | 6.5    | <0.001  |
| Age at diagnosis (years)                   | 7.1           | 4.3    | 9.7                | 5.3    | 11.5               | 6.5    | 12.2           | 6.5    | <0.001  |
| Duration (years)                           | 72.2          | 5.1    | 60.8               | 3.9    | 53.4               | 2.8    | 50.8           | 1.0    | <0.001  |
| Insulin dose/kilogram (units/kg)           | 0.45          | 0.18   | 0.43               | 0.19   | 0.47               | 0.18   | 0.45           | 0.17   | 0.03    |
| HbA1c (%)                                  | 7.1           | 0.9    | 7.2                | 0.9    | 7.2                | 1.0    | 7.1            | 0.9    | 0.54    |
| HbA1c (mmol/mol)                           | 54.1          | 9.5    | 55.4               | 9.7    | 55.0               | 10.6   | 54.6           | 10.1   | 0.58    |
| Total cholesterol (mmol/L)                 | 4.1           | 0.7    | 4.1                | 0.8    | 4.2                | 0.9    | 4.2            | 0.8    | 0.44    |
| LDL (mmol/L)                               | 2.0           | 0.6    | 2.1                | 0.5    | 2.1                | 0.6    | 2.1            | 0.6    | 0.58    |
| HDLc (mmol/L)                              | 1.6           | 0.5    | 1.6                | 0.5    | 1.7                | 0.5    | 1.7            | 0.5    | 0.07    |
| Triglycerides (mmol/L)                     | 0.9           | 0.4    | 0.9                | 0.4    | 0.9                | 0.5    | 0.8            | 0.3    | 0.10    |
| Body mass index (kg/m <sup>2</sup> )       | 25.9          | 4.2    | 25.6               | 4.1    | 26.2               | 4.6    | 26.4           | 5.1    | 0.69    |
| eGFR (ml/min/1.73 m <sup>2</sup> )         | 54.3          | 15.1   | 61.5               | 18.1   | 70.3               | 18.9   | 77.0           | 20.1   | <0.001  |
| Serum creatinine (µmol/L)                  | 108.8         | 34.7   | 103.8              | 45.0   | 95.4               | 51.1   | 85.0           | 36.9   | <0.001  |
| ACR (mg/mmol)                              | 15.6          | 23.7   | 6.8                | 17.6   | 6.2                | 31.4   | 12.8           | 70.3   | <0.001  |
| CRP (nmol/L)                               | 29.9          | 37.3   | 25.6               | 49.7   | 21.3               | 51.4   | 4.9            | 9.2    | <0.001  |
| Insulin pump use                           | 28.6          |        | 38.5               |        | 61.0               |        | 72.0           |        | <0.001  |
| Regular physical activity                  | 65.1          |        | 76.3               |        | 80.2               |        | 82.4           |        | 0.05    |
| CVD                                        | 58.1          |        | 57.6               |        | 38.4               |        | 29.9           |        | <0.001  |
| PDR (ETDRS>53)                             | 43.3          |        | 49.6               |        | 47.0               |        | 46.2           |        | 0.73    |
| DN (eGFR≤45 ml/min/1.73m <sup>2</sup> )    | 29.6          |        | 19.0               |        | 11.4               |        | 8.7            |        | <0.001  |
| MNSI≥2**                                   | 51.3          |        | 60.2               |        | 74.1               |        | 68.8           |        | <0.001  |
| Antihypertensive medication                | 57.1          |        | 67.2               |        | 64.9               |        | 63.1           |        | 0.65    |
| Lipid lowering medication                  | 64.3          |        | 63.0               |        | 70.8               |        | 71.6           |        | 0.24    |
| Detectable random c-peptide (>0.02 nmol/L) | 22.7          |        | 43.5               |        | 44.2               |        | 9.5            |        | <0.001  |
| IA2+ or GAD65+                             | 19.1          |        | 39.8               |        | 44.8               |        | 47.6           |        | 0.006   |
| DR3 or 4                                   | 97.6          |        | 95.4               |        | 94.9               |        | 94.0           |        | 0.81    |

eGFR: Estimated glomerular filtration rate; ACR: albumin-creatinine ratio; CRP: c-reactive protein; CVD: cardiovascular disease; PDR: proliferative diabetic retinopathy; DN: diabetic nephropathy; MNSI: Michigan Neuropathy Screening Instrument

**Supplemental Table 4. Characteristics of Joslin 50 Year Medalists who have died, overall and by decade of diagnosis**

| Variable                                   | Overall<br>N=123 |        | <1940<br>N=24 |        | 1940-1949<br>N=40 |        | 1950-1959<br>N=55 |        | 1960+<br>N=4 |        | p-value |
|--------------------------------------------|------------------|--------|---------------|--------|-------------------|--------|-------------------|--------|--------------|--------|---------|
|                                            | Mean; %          | SD (±) | Mean; %       | SD (±) | Mean; %           | SD (±) | Mean; %           | SD (±) | Mean; %      | SD (±) |         |
| Sex (male)                                 | 58.5             |        | 66.7          |        | 52.5              |        | 58.2              |        | 75.0         |        | 0.64    |
| Age (years)                                | 72.8             | 8.4    | 81.0          | 6.4    | 72.1              | 6.9    | 70.2              | 8.1    | 66.5         | 5.0    | <0.001  |
| Age at diagnosis (years)                   | 13.5             | 7.5    | 7.5           | 4.6    | 11.9              | 5.7    | 17.2              | 7.7    | 15.3         | 5.4    | <0.001  |
| Duration (years)                           | 59.3             | 8.6    | 73.5          | 5.5    | 60.3              | 3.8    | 52.9              | 2.5    | 51.3         | 0.5    | <0.001  |
| Insulin dose/kilogram (units/kg)           | 0.44             | 0.17   | 0.43          | 0.15   | 0.41              | 0.14   | 0.45              | 0.17   | 0.7          | 0.26   | 0.03    |
| HbA1c (%)                                  | 7.4              | 1.0    | 7.1           | 0.9    | 7.6               | 1.1    | 7.4               | 1.0    | 6.7          | 0.8    | 0.54    |
| HbA1c (mmol/mol)                           | 57.3             | 11.1   | 54.6          | 9.7    | 59.8              | 12.3   | 57.1              | 10.6   | 49.5         | 8.2    | 0.18    |
| Total cholesterol (mmol/L)                 | 4.1              | 0.9    | 4.1           | 0.6    | 4.1               | 0.8    | 4.1               | 1.0    | 3.9          | 0.5    | 0.88    |
| LDL (mmol/L)                               | 2.1              | 0.6    | 2.0           | 0.5    | 2.1               | 0.6    | 2.1               | 0.7    | 2.1          | 0.5    | 0.95    |
| HDLc (mmol/L)                              | 1.6              | 0.5    | 1.6           | 0.5    | 1.6               | 0.5    | 1.5               | 0.5    | 1.4          | 0.2    | 0.83    |
| Triglycerides (mmol/L)                     | 0.9              | 0.5    | 1.0           | 0.4    | 0.8               | 0.3    | 1.0               | 0.6    | 0.9          | 0.2    | 0.88    |
| Systolic blood pressure (mmHg)             | 134.3            | 20.1   | 134.7         | 22.7   | 136.4             | 19.3   | 132.2             | 20.4   | 143.0        | 16.7   | 0.16    |
| Diastolic blood pressure (mmHg)            | 61.3             | 8.1    | 65.3          | 8.9    | 59.4              | 6.4    | 60.8              | 8.2    | 68.0         | 9.8    | <0.001  |
| Body mass index (kg/m <sup>2</sup> )       | 25.8             | 4.5    | 26.1          | 3.8    | 24.9              | 4.7    | 26.2              | 4.7    | 26.3         | 2.6    | 0.69    |
| eGFR (ml/min/1.73 m <sup>2</sup> )         | 54.2             | 19.4   | 51.1          | 13.2   | 53.8              | 19.4   | 56.7              | 20.1   | 45.4         | 37.2   | <0.001  |
| Serum creatinine (µmol/L)                  | 121.5            | 56.4   | 114.7         | 32.1   | 118.3             | 49.4   | 121.1             | 59.2   | 197.1        | 132.8  | 0.64    |
| ACR (mg/mmol)                              | 26.2             | 72.2   | 27.6          | 30.0   | 11.6              | 27.4   | 29.2              | 92.5   | 103.8        | 103.9  | 0.08    |
| CRP (nmol/L)                               | 38.0             | 66.4   | 44.3          | 45.4   | 36.5              | 77.0   | 39.4              | 68.4   | 1.0          | 0.0    | 0.001   |
| Insulin pump use                           | 64.4             |        | 13.6          |        | 29.7              |        | 44.2              |        | 100.0        |        | 0.003   |
| Regular physical activity                  | 68.1             |        | 56.5          |        | 68.4              |        | 74.5              |        | 50.0         |        | 0.39    |
| CVD                                        | 71.8             |        | 78.3          |        | 76.3              |        | 67.3              |        | 50.0         |        | 0.51    |
| PDR (ETDRS>53)                             | 56.7             |        | 57.1          |        | 55.9              |        | 56.4              |        | 66.7         |        | 0.99    |
| DN (eGFR≤45 ml/min/1.73m <sup>2</sup> )    | 31.9             |        | 34.8          |        | 30.8              |        | 30.2              |        | 50.0         |        | 0.85    |
| MNSI≥=2                                    | 58.4             |        | 35.0          |        | 52.8              |        | 67.9              |        | 100.0        |        | 0.02    |
| Antihypertensive medication                | 65.2             |        | 65.2          |        | 57.9              |        | 68.1              |        | 100.0        |        | 0.36    |
| Lipid lowering medication                  | 73.3             |        | 68.2          |        | 68.4              |        | 76.9              |        | 100.0        |        | 0.46    |
| Detectable random c-peptide (>0.02 nmol/L) | 41.3             |        | 13.0          |        | 42.5              |        | 55.6              |        | 0.0          |        | 0.002   |
| IA2+ or GAD65+                             | 19.3             |        | 18.2          |        | 45.0              |        | 37.7              |        | 25.0         |        | 0.19    |
| DR3 or 4                                   | 97.4             |        | 100.0         |        | 97.3              |        | 98.0              |        | 75.0         |        | 0.04    |

eGFR: Estimated glomerular filtration rate; ACR: albumin-creatinine ratio; CRP: c-reactive protein; CVD: cardiovascular disease; PDR: proliferative diabetic retinopathy; DN: diabetic nephropathy; MNSI: Michigan Neuropathy Screening Instrument
